# Supplementary material for: A loose endosperm structure of wheat seed produced under low nitrogen level promotes early germination by accelerating water uptake
Source: PubMed Central journal article supplement (PMC5465190; doi:10.1038/s41598-017-03333-4), 2017-06-08
Supplement: 41598_2017_3333_MOESM1_ESM.pdf [file 41598_2017_3333_MOESM1_ESM.pdf]

A loose endosperm structure of wheat seed produced under low nitrogen level promotes early germination by accelerating water uptake

Daxing Wen, Haicheng Xu, Liuyong Xie, Mingrong He, Hongcun Hou, Chunqing Zhang\*

State Key Laboratory of Crop Biology, Agronomy College, Shandong Agricultural University,  
Tai'an, Shandong Province 271018, P. R. China

\* Corresponding author: Chunqing Zhang

E-mail: cqzhang@sdau.edu.cn

## Supplementary materials

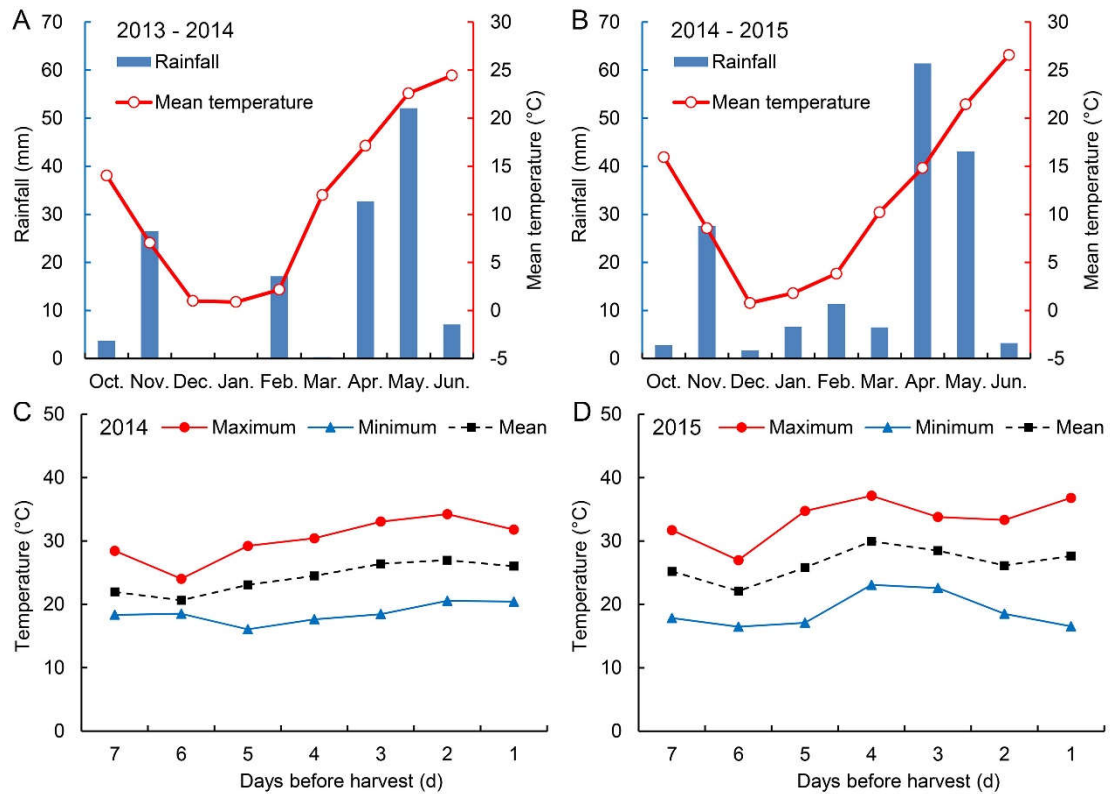

**Supplementary Figure S1. Meteorological data recorded during the period of wheat growth (October to June).** (A) and (B) Rainfall and mean temperature in 2013 – 2014 and 2014 – 2015. (C) and (D) Daily maximum temperature, daily minimum temperature and daily mean temperature of one week before harvest.

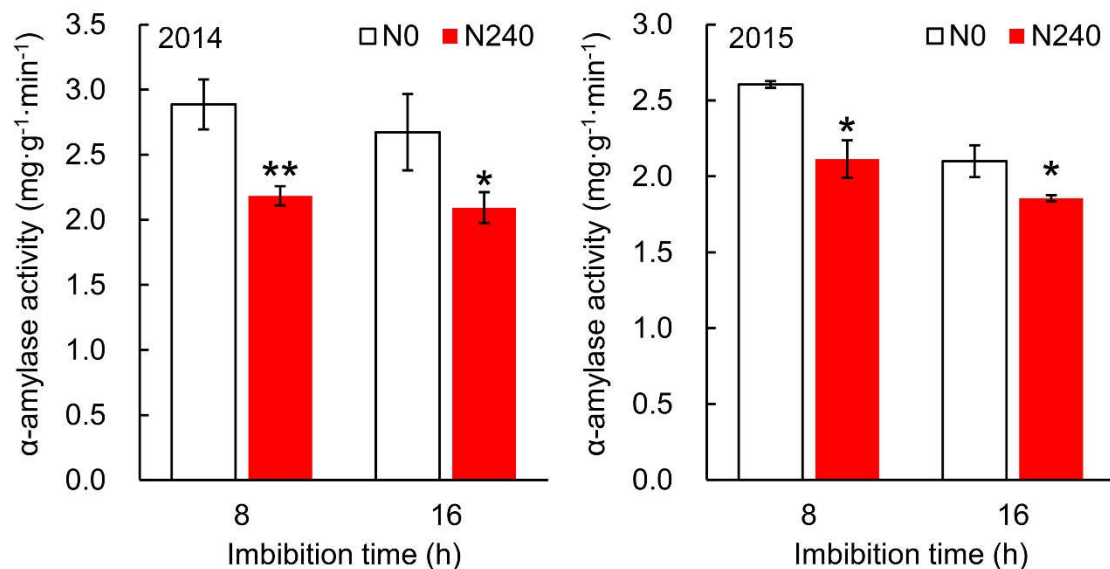

**Supplementary Figure S2. Comparison of α-amylase activities between N0 seeds and N240 seeds at 8 and 16 HAI.**

Supplementary Table S1. Effects of nitrogen fertilizer on seed size in two years

| Year | Treatment | 1000-grain weight (g) | Length (mm)   | Width (mm)    |
|------|-----------|-----------------------|---------------|---------------|
| 2014 | N0        | 34.2 ± 0.3 c          | 6.02 ± 0.12 b | 3.32 ± 0.02 b |
|      | N168      | 38.8 ± 0.4 a          | 6.35 ± 0.02 a | 3.55 ± 0.05 a |
|      | N240      | 38.3 ± 0.4 a          | 6.43 ± 0.01 a | 3.57 ± 0.01 a |
|      | N300      | 35.9 ± 0.5 b          | 6.32 ± 0.06 a | 3.54 ± 0.01 a |
| 2015 | N0        | 37.0 ± 0.5 a          | 6.22 ± 0.01 b | 3.51 ± 0.02 a |
|      | N168      | 35.5 ± 0.2 b          | 6.46 ± 0.01 a | 3.44 ± 0.03 a |
|      | N240      | 35.2 ± 0.8 b          | 6.43 ± 0.03 a | 3.41 ± 0.08 a |
|      | N300      | 32.6 ± 0.4 c          | NA            | NA            |

The values represent the means ± standard deviation (n=3). Different letters indicated significant differences among means under different treatments (p value ≤ 0.05 by one-way ANOVA analysis).

Supplementary Table S2. Summary of RNA-sequencing data

| Sample | Raw Reads | Clean reads | Total mapped      | Multiple mapped  | Uniquely mapped   |
|--------|-----------|-------------|-------------------|------------------|-------------------|
| A8_1   | 41911084  | 39852264    | 29199234 (73.27%) | 4266938 (10.71%) | 24932296 (62.56%) |
| A8_2   | 42811438  | 40633278    | 29857610 (73.48%) | 4346748 (10.70%) | 25510862 (62.78%) |
| A8_3   | 46819704  | 44472148    | 32691521 (73.51%) | 4690867 (10.55%) | 28000654 (62.96%) |
| B8_1   | 47425206  | 45066824    | 33376961 (74.06%) | 5141076 (11.41%) | 28235885 (62.65%) |
| B8_2   | 51087202  | 48510756    | 35957118 (74.12%) | 5586436 (11.52%) | 30370682 (62.61%) |
| B8_3   | 47649162  | 45187490    | 33588473 (74.33%) | 5148132 (11.39%) | 28440341 (62.94%) |

A8: N0 seeds at 8 HAI. B8: N240 seeds at 8 HAI.

Supplementary Table S3. List of selected genes about protein metabolism that were differentially expressed in B8 VS A8.

| Gene ID              | Gene Annotation                  | log2FoldChange | p-value  |
|----------------------|----------------------------------|----------------|----------|
| Traes_5DL_CEBA87E3F  | Protein synthesis inhibitor II   | 2.3508         | 1.21E-43 |
| Traes_5BL_D6C9D200D1 | Protein synthesis inhibitor I    | 2.1278         | 9.90E-06 |
| Traes_5DL_DF4EA7BE9  | Protein synthesis inhibitor I    | 1.8587         | 4.73E-03 |
| Traes_4BL_73E79F141  | Beta-amylase                     | 1.4758         | 6.14E-14 |
| Traes_5BL_BF328BC61  | protein phosphatase 2C           | 0.5886         | 7.11E-03 |
| Traes_7BS_5ECCA936B  | 60S ribosomal protein L32-1      | 0.5176         | 7.95E-03 |
| Traes_6DL_03A05A5D7  | 60S ribosomal protein L14-1      | 0.5014         | 3.25E-06 |
| Traes_2AL_E513B22A7  | Unknown                          | 0.4974         | 5.87E-04 |
| Traes_1AS_CDFADEA22  | 40S ribosomal protein            | 0.4368         | 8.10E-03 |
| Traes_2BS_9FC5D6F3A  | 40S ribosomal protein S7         | 0.3756         | 2.24E-02 |
| Traes_6AL_FE1447C07  | 60S ribosomal protein L14-1      | 0.3373         | 8.99E-03 |
| Traes_2DS_8318AD213  | 60S ribosomal protein L36a       | 0.3308         | 4.04E-02 |
| Traes_6BL_62CC48C2C  | 60S ribosomal protein L14-1      | 0.3308         | 1.28E-02 |
| Traes_3DL_F1AA506F4  | 60S ribosomal protein L36-2      | 0.3281         | 4.69E-02 |
| Traes_2DL_F311FFC60  | 60S acidic ribosomal protein P2A | 0.3258         | 1.93E-02 |
| Traes_5AL_3B1FFF708  | 60S ribosomal protein L34        | 0.3201         | 2.39E-02 |
| Traes_1DL_22BFD4845  | 40S ribosomal protein S15a-1     | 0.3158         | 2.71E-02 |
| Traes_6DL_164671C3E  | 60S ribosomal protein L37-2      | 0.2995         | 2.88E-02 |
| Traes_6AL_D5111DA34  | 60S ribosomal protein L37-3      | 0.2986         | 1.62E-02 |
| Traes_4DL_BBA5E7BFC  | 40S ribosomal protein S21        | 0.2935         | 4.28E-02 |

Supplementary Table S4. Primers used for qRT-PCR.

| Primer                        | Sequence (5' to 3')    |
|-------------------------------|------------------------|
| <i>Actin-F</i>                | CGAAGCGACATACAATTCCATC |
| <i>Actin-R</i>                | GAACCTCCACTGAGAACAACAT |
| <i>Traes_5DL_CEBA87E3F-F</i>  | GTAACGACGCTGCTCCTCTTG  |
| <i>Traes_5DL_CEBA87E3F-R</i>  | CTCTTCTTCTCCACCGCCTTG  |
| <i>Traes_5BL_D6C9D200D1-F</i> | TCTGCCGACTATGTCACCTT   |
| <i>Traes_5BL_D6C9D200D1-R</i> | CGATGTCTTGAGCACGATGT   |
| <i>Traes_5BL_E68C461B3-F</i>  | CCATTGCTCCAGTTGGCATCTT |
| <i>Traes_5BL_E68C461B3-R</i>  | CCGCTACAACGACCAAACCAT  |
| <i>Traes_2BL_2D440C559-F</i>  | CGCCTTCTTCGCTCACTTCAT  |
| <i>Traes_2BL_2D440C559-R</i>  | TGTTCTGCTCGTCGAGTAATC  |
| <i>Traes_3DL_4C255B900-F</i>  | AGGACATCATCGGAAGGACTCA |
| <i>Traes_3DL_4C255B900-R</i>  | GCTGGTAGTCTTGCCTGCTAA  |
| <i>Traes_6BS_89265ECAD-F</i>  | TCAGAGCACACGAGGAGGA    |
| <i>Traes_6BS_89265ECAD-R</i>  | CCGAGAAGAGTGGTGAGCAGAT |
